# Supplementary material
Source: MDPI journal article supplement (https://www.mdpi.com/2311-7524/7/12/543)

Supplementary Data File: Correlation matrix, showing all pairwise between physiological and morphological features. The color code following the scale. Asterisks (\*) denote significant correlation at least  $P < 0.05$ .

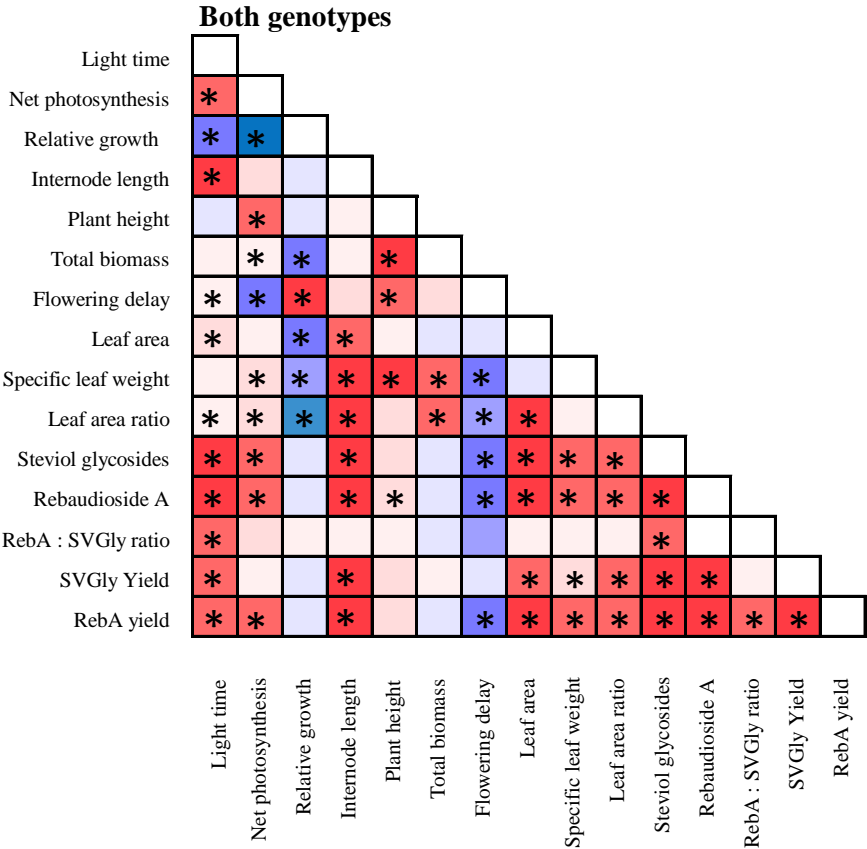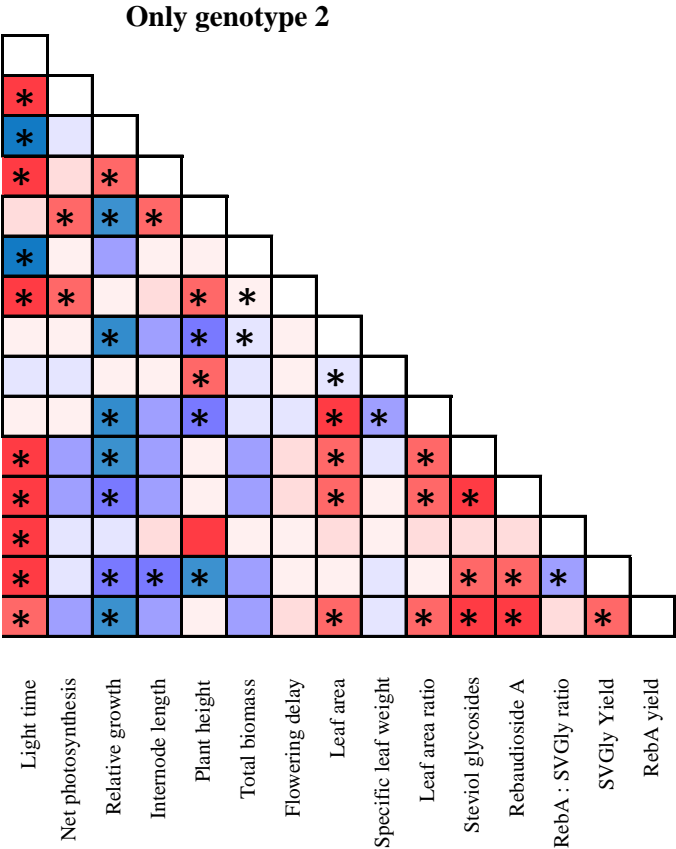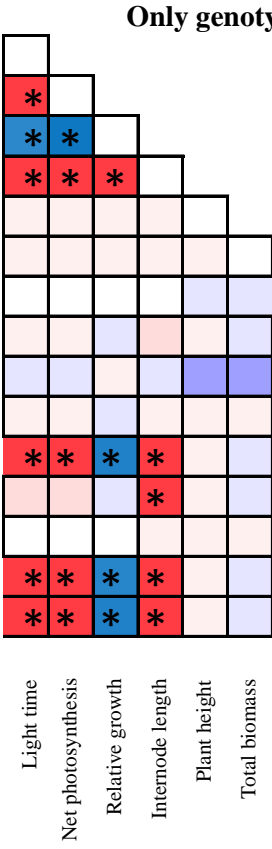

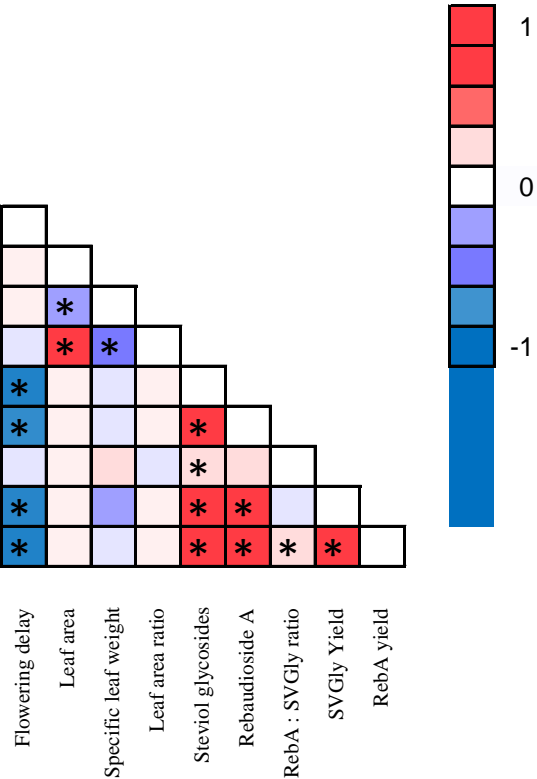

Supplement: s1 [file s1]
